# Supplementary material
Source: PubMed Central journal article supplement (PMC7775658)
Supplement: NIHMS1657955-supplement-Supplemental_Material.pdf [file NIHMS1657955-supplement-Supplemental_Material.pdf]

1 **SUPPORTING INFORMATION**

2  
3 **Novel insights into the taxonomic diversity and molecular mechanisms of bacterial Mn(III)**  
4 **reduction**

5 Nadia Szeinbaum<sup>1,2,6‡</sup>, Brook L. Nunn<sup>3</sup>, Amanda R. Cavazos<sup>2</sup>, Sean A. Crowe<sup>2,4</sup>, Frank J.  
6 Stewart<sup>1,5</sup>, Thomas J. DiChristina<sup>1</sup>, Christopher T. Reinhard<sup>2,6</sup>, and Jennifer B. Glass<sup>2,6\*</sup>

7  
8 <sup>1</sup>School of Biological Sciences, Georgia Institute of Technology, Atlanta, GA, USA

9 <sup>2</sup>School of Earth and Atmospheric Sciences, Georgia Institute of Technology, Atlanta, GA, USA

10 <sup>3</sup>Department of Genome Sciences, University of Washington, Seattle, WA, USA

11 <sup>4</sup>Department of Microbiology & Immunology and Department of Earth, Ocean, & Atmospheric  
12 Sciences, University of British Columbia, Vancouver, Canada

13 <sup>5</sup>Department of Microbiology and Immunology, Montana State University, Bozeman, Montana

14 <sup>6</sup>NASA Astrobiology Institute, Alternative Earths Team, Mountain View, CA

15 <sup>‡</sup>Now at Beyond Meat, El Segundo, CA

16 \*Corresponding author: [jennifer.glass@eas.gatech.edu](mailto:jennifer.glass@eas.gatech.edu)

17 **Running title:** Novel undecaheme in Betaproteobacteria

18 **Content:**

19  
20 **1. Experimental procedures**

21 **2. Supplemental tables**

22 **3. Supplemental figures**

23

24       **1. Experimental procedures**

25       **Source of inoculum.** Lake Matano is a metal-rich, ancient ocean analog with an active Mn cycle  
26 (1, 2). Organic carbon in Lake Matano is mostly mineralized via methanogenesis (3). A 15-cm  
27 sediment core from 200 m water depth in Lake Matano, Sulawesi Island, Indonesia  
28 ( $02^{\circ}26'27.1''\text{S}$ ,  $121^{\circ}15'12.3''\text{E}$ ; *in situ* sediment temperature  $\sim 27^{\circ}\text{C}$ ) was sampled in November  
29 2014 and sub-sampled at 2.5-cm increments. Sediments were sealed in gas-tight Mylar bags with  
30 no headspace (4) and stored at  $4^{\circ}\text{C}$  for  $\sim 1$  year.

31

32       **Inoculation of enrichment cultures.** Mylar bags containing sediment samples were opened in  
33 an anoxic chamber (97%  $\text{N}_2$  and 3%  $\text{H}_2$ ; Coy Laboratory Products, Grass Lake, MI, USA).  
34 Sediments from each 2.5 cm subsample were transferred to 160 mL serum bottles, diluted 1:2  
35 with minimal media, and pre-incubated for 45 days at  $30^{\circ}\text{C}$  in 100%  $\text{N}_2$  headspace to deplete  
36 endogenous organic carbon, electron donors, and electron acceptors. Sediments from the top 5  
37 cm were subsequently mixed together and transferred to defined medium at a 1:20 dilution  
38 (transfer 1, day 45) amended with Mn(III) and a headspace of  $\text{CH}_4:\text{N}_2$  (50:50) or  $\text{N}_2$ . Subsequent  
39 transfers were carried out in the same way (transfer 2, day 91; transfer 3, day 183; transfer 4, day  
40 230) for  $\text{CH}_4$  headspace cultures, with heat-killed and substrate controls generated each time  
41 using the newly transferred culture (10% v/v dilution). By day 210, enrichments appeared to be  
42 sediment-free, except for microparticles. The fifth transfer (day 245) inoculated using non-  
43 labeled methane, was used entirely for metaproteomic analysis after visual confirmation of active  
44 Mn(III) reduction in the live enrichment bottles (see **Figs. 1, S1**). Two 100 mL bottles were  
45 pooled together to obtain 200 mL duplicates for each treatment, centrifuged ( $10,000 \times g$ , 30

46 min, 4°C) and supernatant-free pellets were stored at -80°C until protein extraction and  
47 metaproteomic sequencing.

48 Defined medium consisted of modified artificial freshwater medium lacking nitrate and  
49 sulfate, developed based on the pore water composition of Lake Matano sediments as described  
50 in prior work (5). The medium contained 3 mM NaHCO<sub>3</sub>, 825 μM MgCl<sub>2</sub>, 550 μM CaCO<sub>3</sub>, 225  
51 μM NH<sub>4</sub>Cl, 5 μM Na<sub>2</sub>HPO<sub>4</sub>, 3.5 μM K<sub>2</sub>HPO<sub>4</sub>, and a trace metal solution (1 nM CuCl<sub>2</sub>, 1.5 nM  
52 Na<sub>2</sub>MoO<sub>4</sub>, 2.5 nM CoCl<sub>2</sub>, 23 nM MnCl<sub>2</sub>, 9 nM FeCl<sub>3</sub>, 4 nM ZnCl<sub>2</sub>, 0.091 μg/L vitamin B<sub>12</sub>,  
53 0.091 μg/L biotin, and 18.18 μg/L thiamine. Vitamins were filter-sterilized and added after  
54 autoclaving. Bottles were stoppered with sterile black bromobutyl stoppers (Geo-Microbial  
55 Technologies, Ochelata, OK, USA; pre-boiled in 0.1 N NaOH), and crimped with aluminum  
56 seals. An acetate-free 10 mM stock of Mn(III)-pyrophosphate was prepared using solid Mn<sub>2</sub>O<sub>3</sub>  
57 (99% purity, 325 mesh powder, Sigma Aldrich) instead of Mn(III)-acetate (6) and filter-  
58 sterilized. Mn(III)-pyrophosphate was added at a final concentration of 1 mM. Bottles were  
59 purged with 99.9% N<sub>2</sub> for 20 min, and were appropriate, CH<sub>4</sub> was injected with a 50% headspace  
60 volume of CH<sub>4</sub> at a 1:1 labeled to unlabeled ratio (99.9% CH<sub>4</sub> and 99% <sup>13</sup>CH<sub>4</sub>; Cambridge  
61 Isotope Laboratories, Tewksbury, MA, USA). Heat-killed controls were autoclaved prior to  
62 Mn(III) or CH<sub>4</sub> addition. All treatments were duplicated, and bottles were incubated in the dark  
63 at 30°C.

64 **Substrate utilization.** The benzidine method was used to measure Mn(III) consumption  
65 (7) throughout the transfer 4 enrichment. Methane (<sup>13</sup>CH<sub>4</sub>) oxidation was monitored by  
66 measuring <sup>13</sup>C enrichment in dissolved inorganic carbon as described in (5).

67 **16S rRNA gene amplicon sequencing.** To identify the dominant microbial community  
68 members, we analyzed the microbial community composition of samples taken at the end of each

69 enrichment period by sequencing 16S rRNA gene amplicons as described previously (5). Reads  
70 were analyzed using Mothur (8) following its MiSeq standard operating procedure  
71 ([https://www.mothur.org/wiki/MiSeq\\_SOP](https://www.mothur.org/wiki/MiSeq_SOP), accessed November 2017). Merged reads were  
72 dereplicated and aligned to the ARB SILVA SSU database release 123 (July 23, 2015).  
73 Homopolymers longer than 8bp were filtered out. Reads were then clustered into OTUs at 97%  
74 similarity based on uncorrected pairwise distance matrices. OTUs were classified using the ARB  
75 SILVA SSU reference taxonomy database release 123.

76 **Metagenome (DNA) sequencing and assembly.** Community DNA was processed using  
77 the Nextera XT DNA Sample Prep kit and sequenced using a paired-end Illumina MiSeq 600 kit.  
78 Raw reads were submitted to NCBI. The accessions for the study and samples in the submission  
79 are PRJNA489678, LakeMatanoMn3\_Enrichment (SAMN10343573). The accession numbers  
80 for the N<sub>2</sub> headspace experiment and run are LM\_Mn(III)\_2018 (SRX5007804) and  
81 LakeMatano\_11\_NoMethane\_R1.fastq.gz (SRR8188020), and the accession numbers for the  
82 CH<sub>4</sub> headspace experiment and run are LM\_Mn(III)\_CH4\_2018 (SRX5007805) and  
83 LakeMatano\_9\_Methane\_R1.fastq.gz (SRR8188019).

84 Barcoded sequences were de-multiplexed, trimmed (length cutoff 100 bp), and filtered to  
85 remove low quality reads (average Phred score <25) using Trim Galore!  
86 ([http://www.bioinformatics.babraham.ac.uk/projects/trim\\_galore/](http://www.bioinformatics.babraham.ac.uk/projects/trim_galore/)). Forward and reverse reads  
87 were assembled using SPAdes (9) with the ‘meta’ option. Metagenomic reads were deposited in  
88 NCBI. Contigs  $\geq$  500 nt were organized into MAGs based on tetranucleotide frequency and  
89 sequence coverage using MaxBin 2.0 (10). MAG completeness and contamination were  
90 estimated by lineage-specific marker genes using CheckM (11). We obtained one  
91 *Betaproteobacteria* metagenome-assembled genome (MAG; *Rhodocyclales* bacterium GT-UBC,

92 NCBI accession QXPY01000000) with 99.53% completeness, 0.02% contamination, 60.9% GC  
93 content, and 4,555 protein-coding genes. We provisionally classified *Rhodocyclales* bacterium  
94 GT-UBC as a new species within the *Dechloromonas* genus, which we named “*Candidatus*  
95 *Dechloromonas occultata*” sp. nov.; etymology: *occultata*; (L. fem. adj. ‘hidden’), based on its  
96 resistance to cultivation. We also obtained one *Deltaproteobacteria* MAG (*Desulfuromonadales*  
97 bacterium GT-UBC; NCBI accession RHLS01000000) with 99.36% completeness, 0.64%  
98 contamination, 59.9% GC content, 3,617 protein-coding genes, and 80% ANI to *Geobacter*  
99 *sulfurreducens*. We provisionally named *Desulfuromonadales* bacterium GT-UBC “*Candidatus*  
100 *Geobacter occultata*” sp. nov.

101 **Comparative genomic analysis.** The “*Ca. D. occultata*” MAG was annotated using  
102 RAST. Metabolic pathways were identified in RAST (12-14), and manually checked for  
103 completeness in PATRIC (15), following pathways reported in KEGG  
104 (<https://www.genome.jp/kegg/>) and MetaCyc (<https://metacyc.org/>) and confirming potential  
105 new variants in the literature (references where appropriate throughout the manuscript). For  
106 incomplete pathways, the three other genomes of isolated *Dechloromonas* strains (*D. aromatica*,  
107 *D. denitrificans*, and *D. agitata*) in PATRIC were searched for missing proteins. Central  
108 metabolic and secondary pathways were compared among *Dechloromonas* spp. and other metal-  
109 cycling species using the RAST subsystems option, searching for specific annotated proteins  
110 with RAST, and within PATRIC using the Compare Region Viewer and its heatmap options.  
111 Proteins of interest were characterized *in silico* based on conserved domains and homology  
112 searches with BLAST and NCBI tools. Localization of proteins was predicted using PSORTb  
113 model ECSVM (16). The synteny of gene clusters containing functional genes of interest were  
114 analyzed using Simple Synteny (<https://www.dveltri.com/simplesynteny/cfinder.html>), last

115 accessed July 2018). Putative multiheme *c*-type cytochromes ( $\geq 3$  Cxx(x)CH motifs) were  
116 identified using a previously reported Python script (<https://github.com/bondlab/scripts>, (17)).

117 **Phylogenetic analysis.** The evolutionary history of functional genes was inferred using  
118 MEGA7 (18) with the Maximum Likelihood method based on the JTT matrix-based model (19).  
119 After all gaps were eliminated, initial tree(s) for the heuristic search were obtained automatically  
120 by applying Neighbor-Join and BioNJ algorithms to a matrix of pairwise distances estimated  
121 using a JTT model, and then selecting the topology with superior log likelihood value. The trees  
122 were drawn to scale, with branch lengths measured in the number of substitutions per site and  
123 bootstrap values based on 500 replicates. The synteny of selected genes was determined using  
124 Simple Synteny (20). The evolutionary history of selected whole genomes of Proteobacteria was  
125 reconstructed using GToTree (21) with genomic NCBI IDs as input, retrieved manually. Single-  
126 copy genes (SCGs) were identified from a set of 74 single-copy genes. GToTree uses  
127 concatenated alignments of identified SCGs to build the phylogenomic tree with FastTree. The  
128 final tree was viewed and edited in FigTree V1.4.4 (22).

129 **Protein digestion and desalting.** To solubilize oxidized metal precipitants and  
130 precipitate proteins, 100  $\mu$ L of 20% trichloroacetic acid (4°C) was added to each sample and  
131 incubated on ice for 1 hour. Bacterial cells and soluble proteins were pelleted at 10,000 x g (1 hr,  
132 4°C). Cells were then resuspended in 100  $\mu$ L of 6 M urea in 50 mM  $\text{NH}_4\text{HCO}_3$  and lysed using a  
133 sonicating probe (3 watts; 15s, 5 times), alternating in dry ice in ethanol to keep the sample cold.  
134 Sonication, digestion, and desalting proceeded as previously described (23). Briefly, after  
135 sonication and protein quantification using the Bradford assay (Bio-Rad, Hercules, CA), tris(2-  
136 carboxyethyl)phosphine (TCEP) was added to reduce samples (1 hr, 37°C), and iodoacetamide  
137 was used as the alkylating agent (1hr, in dark, RT).  $\text{NH}_4\text{HCO}_3$  and HPLC-grade methanol were

138 added to each sample to dilute the urea to allow the trypsin digestion to proceed. Trypsin was  
139 added in a 1:20 ratio and incubated overnight at RT. The digestion was stopped by adding small  
140 aliquots of 10% formic acid until a pH < 2 was achieved. Prior to desalting the peptides, samples  
141 were dried down and reconstituted in 5% acetonitrile with 0.1% trifluoroacetic acid. Desalting  
142 was carried out with MicroSpin C18 columns following the manufacturer's instructions (The  
143 Nest Group). Peptides were dried and reconstituted in 5% ACN with 0.1% formic acid to achieve  
144 concentrations of 2  $\mu\text{g } \mu\text{L}^{-1}$ .

145 **LC-MS/MS.** The mass spectrometry analysis was performed on a QExactive at the  
146 University of Washington Proteomics Resource (Seattle, WA). Samples were separated and  
147 introduced into the mass spectrometer (MS) by reverse-phase chromatography using a  
148 Manufactured PicoTip fused silica capillary column (30 cm long, 75  $\mu\text{m}$  i.d.) packed with C18  
149 particles (Dr. Maisch ReproSil-Pur; C18-Aq, 120  $\text{\AA}$ , 3  $\mu\text{m}$ ) fitted with a 3 cm long, 100  $\mu\text{m}$  i.d.  
150 precolumn (Dr. Maisch ReproSil-Pur; C18-Aq, 120  $\text{\AA}$ , 3  $\mu\text{m}$ ). Peptides were eluted using an  
151 acidified (formic acid, 0.1% v/v) water-acetonitrile gradient (5–35% acetonitrile in 90 min) and  
152 mass spectrometry was performed on a Thermo Fisher (San Jose, CA) QExactive (QE). The top  
153 20 most intense ions were selected for MS2 acquisition from precursor ion scans of 400–  
154 1200  $\text{m } z^{-1}$ . Centroid full MS resolution data was collected at 70,000 with AGC target of 1E6  
155 and centroid MS2 data was collected at resolution of 35,000 with AGC target of 5E4. Dynamic  
156 exclusion was set to 15 seconds and +2, +3, +4 ions were selected for MS2 using data dependent  
157 acquisition mode (DDA). Quality control (QC) peptide mixtures were analyzed every fifth  
158 injection to monitor chromatography and MS sensitivity. Skyline was used to determine that QC  
159 standards did not deviate >10% through all analyses (24). The mass spectrometry data were  
160 deposited to the ProteomeXchange Consortium via the PRIDE partner repository with the dataset

161 identifier PXD011642.

162 **Protein identification and data analyses.** Peptide identifications from mass  
163 spectrometry data were completed using Comet (25). The protein database used for correlating  
164 spectra with protein identifications was generated from the metagenome by Prokka (26), and  
165 from each individual bin using RAST (13) and included the MAGs to improve peptide spectra  
166 correlations (15). This was then combined with 50 common contaminants and the QC peptides.  
167 Comet parameters included: reverse concatenated sequence database search, trypsin enzyme  
168 specificity, cysteine modification of 57 Da (resulting from the iodoacetamide) and modifications  
169 on methionine of 15.999 Da (oxidation). Concatenated target–decoy database searches were  
170 completed and minimum protein and peptide thresholds were set at  $P > 0.95$  on ProteinProphet  
171 and  $P > 0.99$  on PeptideProphet (27). Protein identifications from the whole-cell lysates were  
172 accepted by ProteinProphet if the above mentioned thresholds were passed, two or more peptides  
173 were identified (PeptideProphet), and at least one terminus was tryptic (27). Calculated false  
174 discovery rates (FDR) were  $<0.01$ . Resulting data files were combined and normalized spectral  
175 abundances were calculated in QPROT with Abacus (28). Abacus parameters include initial  
176 probability threshold of 0.5 on peptides, and a minimum protein probability of 0.8. Abacus  
177 provides consistent protein inferences across biological and technical replicates. Abacus spectral  
178 abundance outputs were analyzed with QSpec, a statistical framework within QPROT, to  
179 determine log fold changes between treatments. Log fold change in protein abundances  
180 calculated using QSpec were accepted if  $\geq 0.5$  and Zstatistic score  $\geq 2.0$  (increased abundance  
181 across all replicates) or  $\leq -0.5$  and Zstatistic score  $\leq -2.0$  (decreased abundance across all  
182 replicates) (28). Peptide counts were normalized to total peptide counts for each treatment.  
183 Averages of normalized technical replicates were used to compare treatments with and without



184 methane. A two-tailed paired t-test was carried out using Excel to test the null hypothesis of no  
185 differential expression among treatments and determine the p-value associated with each change.

186 **Cultivation attempts.** Isolation strategies were designed considering the metabolic potential of  
187 “*Ca. D. occultata*” but failed to isolate the targeted organism. Samples from highly enriched  
188 cultures were inoculated with acetate for denitrification or microaerobic Fe(II) oxidation. For  
189 Fe(II) oxidation, samples were inoculated into two-layered FeS vs. O<sub>2</sub> gradient tubes (29), with 1  
190 mM acetate in the top layer. There was no Fe(II) oxidation in Mn(III)-amended treatments. With  
191 O<sub>2</sub> addition, visual evidence for Fe(II) oxidation was observed, and a *Comamonas* spp. with  
192 closest hits to environmental sequences from lake sediment was isolated. With acetate and  
193 Mn(III), a *Comamonas aquatica* strain was isolated.

194

195 **1. Supplemental Tables**

196

197 **Table S1. Average nucleotide identity of *Dechloromonas* species.** Numbers in the table  
 198 indicate percentage of whole genome nucleotide identity.

|                                                 | <i>Dechloromonas</i><br>sp. UBA6271 | <i>Dechloromonas</i><br><i>denitrificans</i><br>ATCC BAA-841 | <i>Dechloromonas</i><br><i>aromatica</i> RCB | <i>Dechloromonas</i><br>sp. GT-UBC1 | <i>Dechloromonas</i><br><i>agitata</i> is5 | <i>Dechloromonas</i><br>sp. UBA5022 |
|-------------------------------------------------|-------------------------------------|--------------------------------------------------------------|----------------------------------------------|-------------------------------------|--------------------------------------------|-------------------------------------|
| <i>Dechloromonas</i> sp. UBA6271                | 100.00                              |                                                              |                                              |                                     |                                            |                                     |
| <i>Dechloromonas denitrificans</i> ATCC BAA-841 | 80.46                               | 100.00                                                       |                                              |                                     |                                            |                                     |
| <i>Dechloromonas aromatica</i> RCB              | 80.58                               | 82.14                                                        | 100.00                                       |                                     |                                            |                                     |
| <i>Dechloromonas</i> sp. strain GT-UBC1         | 79.65                               | 82.36                                                        | 80.92                                        | 100.00                              |                                            |                                     |
| <i>Dechloromonas agitata</i> is5                | 79.28                               | 81.42                                                        | 81.59                                        | 80.80                               | 100.00                                     |                                     |
| <i>Dechloromonas</i> sp. UBA5022                | 81.42                               | 82.74                                                        | 81.90                                        | 81.37                               | 81.11                                      | 100.00                              |

199

200

201 **Table S2. List of multiheme cytochromes encoded by “*Candidatus Dechloromonas***  
 202 ***occultata*”. Those in bold indicate expressed proteins (see Table 1).**  
 203

| NCBI ID         | Predicted function   | Heme-binding motifs | Protein length (aa) |
|-----------------|----------------------|---------------------|---------------------|
| <b>RIX41009</b> | <b>NapC-like</b>     | <b>4</b>            | <b>207</b>          |
| RIX43626        | NapC-like            | 4                   | 198                 |
| <b>RIX48944</b> | <b>MtoA-2</b>        | <b>10</b>           | <b>320</b>          |
| <b>RIX49874</b> | <b>MtoA-1</b>        | <b>10</b>           | <b>331</b>          |
| RIX49876        | Hypothetical protein | 3                   | 127                 |
| <b>RIX49688</b> | <b>OccA</b>          | <b>3</b>            | <b>327</b>          |
| <b>RIX49689</b> | <b>OccB</b>          | <b>3</b>            | <b>343</b>          |
| RIX49878        | OccD                 | 3                   | 175                 |
| <b>RIX49691</b> | <b>OccF</b>          | <b>4</b>            | <b>289</b>          |
| <b>RIX49694</b> | <b>OccI</b>          | <b>3</b>            | <b>139</b>          |
| <b>RIX49879</b> | <b>OccJ</b>          | <b>4</b>            | <b>338</b>          |
| RIX49695        | OccL                 | 3                   | 194                 |
| RIX49881        | OccM                 | 3                   | 87                  |
| <b>RIX49697</b> | <b>OccP</b>          | <b>11</b>           | <b>922</b>          |
| RIX49727        | Hypothetical protein | 5                   | 695                 |

204  
 205

206 **Table S3. Genomes containing MtoA, OccP, NapA, NirS, NorB, or cNosZ homologs in**  
207 **Alpha-, Beta-, and Gammaproteobacteria.** “Ecosystem Type” refers to the source of inoculum  
208 for pure cultures or the source of environmental DNA for assembled genome of uncultured  
209 organisms. Spreadsheet is attached as supplemental file.  
210

211 **Table S4. Expression levels for “*Ca. D. occultata*” proteins during Mn(III) reduction with**  
212 **and without CH<sub>4</sub>.** Peptide counts are normalized to total “*Ca. D. occultata*” proteins x 10,000.  
213 Blank cells indicate proteins with <5 normalized peptide counts. Gray boxes indicate membrane  
214 proteins with that may be underrepresented by proteomic analyses. SP: signal peptide  
215 (Y:present/N:absent); TMH: numbers of transmembrane helices; # CxxCH: number of heme-  
216 binding motifs; P-sort: predicted cellular location. P: periplasm, C: cytoplasm; OM: outer  
217 membrane; IM: inner membrane, E: extracellular; U: unknown. Spreadsheet is attached as  
218 supplemental figure.  
219

## 2. Supplemental Figures

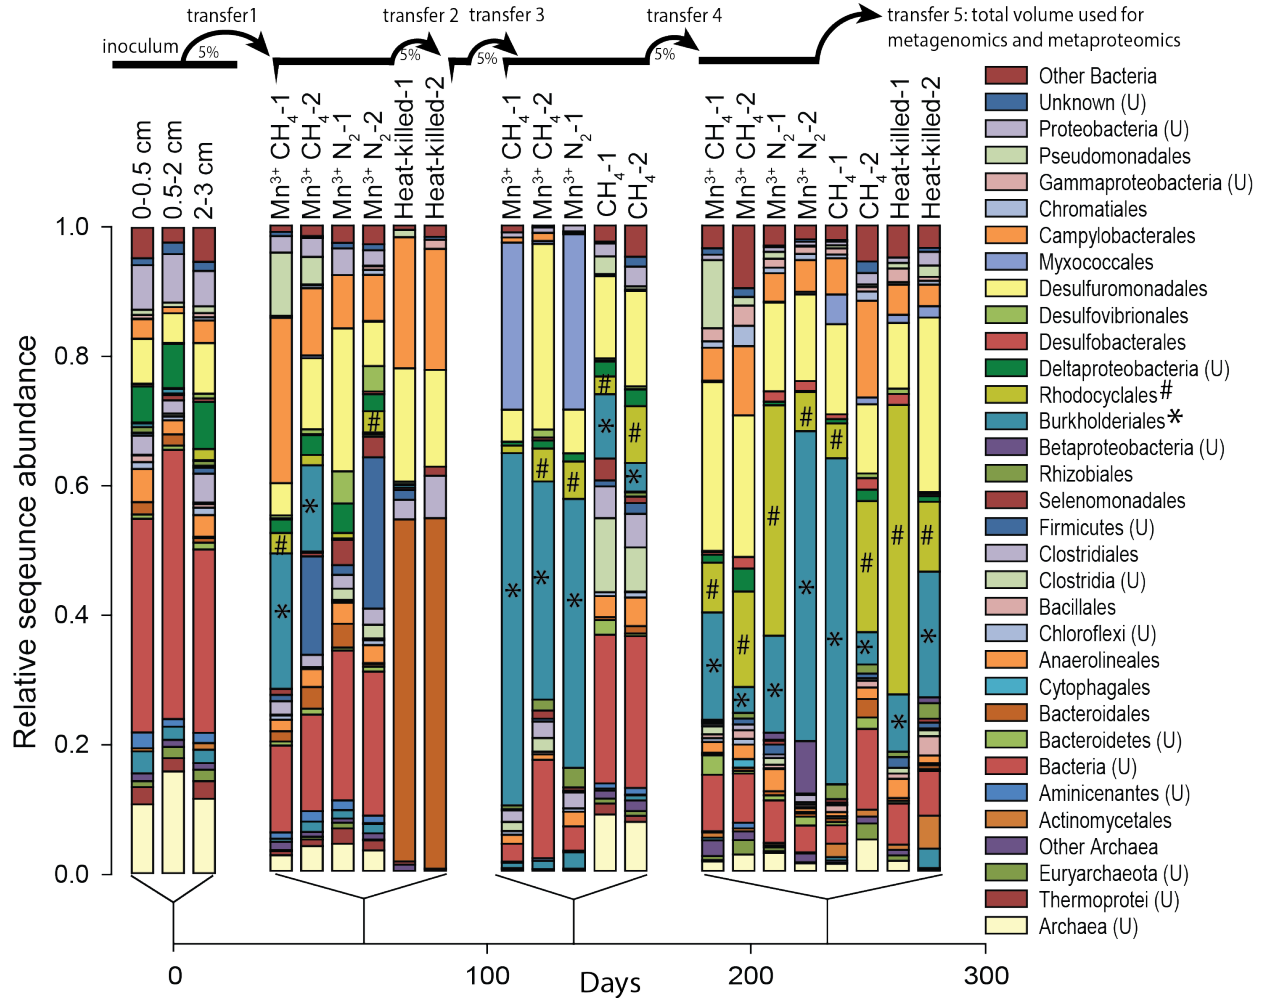

221

222 **Figure S1. Taxonomic succession in enrichment culture.** Relative abundance of taxa enriched

223 from samples from Lake Matano sediments over a 335-day period, based on ~200 bp 16S rRNA

224 gene amplicon sequences. Only live treatments with CH<sub>4</sub> and Mn(III) were transferred. (U)

225 indicates unclassified taxa.

226

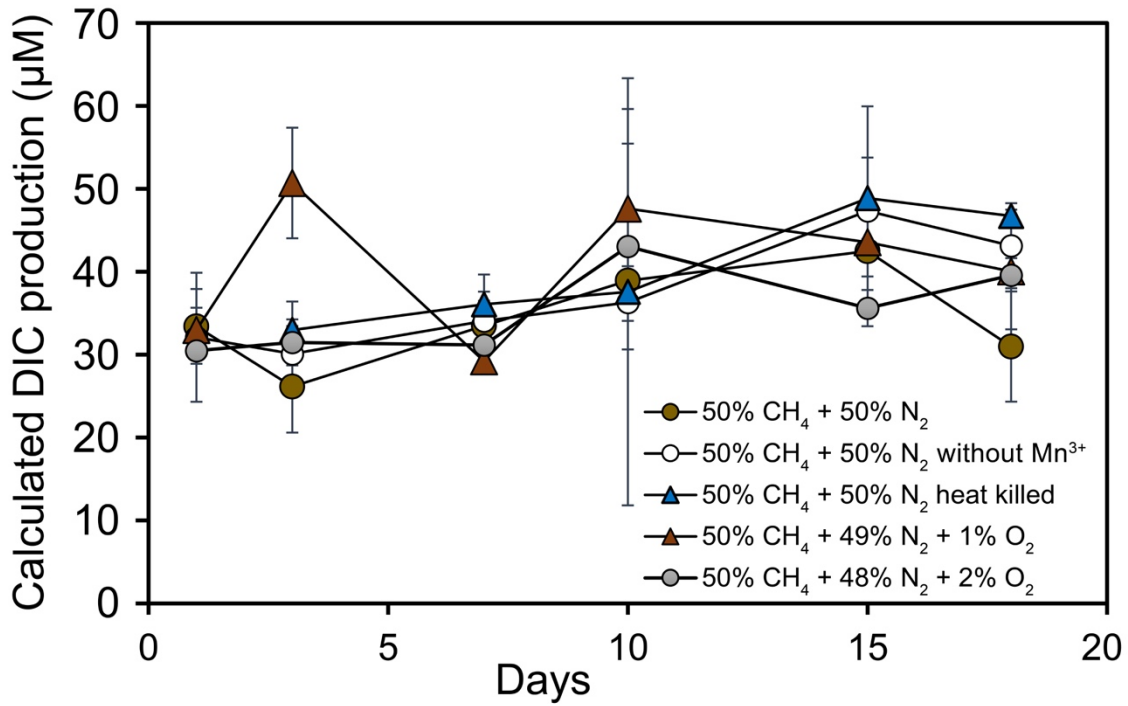

227

228 **Figure S2. Methane oxidation after the fourth transfer of enrichment cultures.** This graph

229 shows the concentration of methane-derived dissolved inorganic carbon (DIC) in sediment

230 enrichments amended with <sup>13</sup>CH<sub>4</sub>, calculated based on isotopic enrichment values and total DIC

231 based on (30). Errors bars represent standard deviation of duplicate measurements.

232

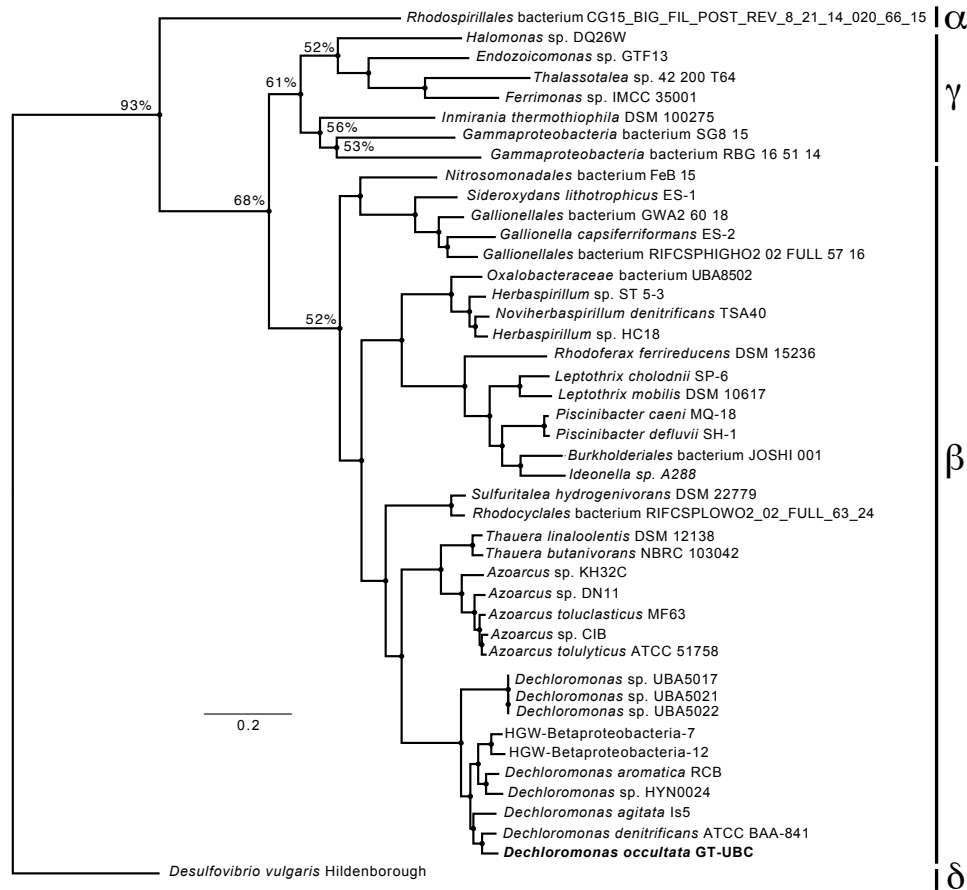

233  
 234 **Figure S3. Phylogeny of “*Candidatus Dechloromonas occulta*” MAG.** The phylogenetic  
 235 placement of the “*Ca. D. occulta*” MAG was compared to genomes of *Alphaproteobacteria*,  
 236 *Betaproteobacteria* and *Gammaproteobacteria*, with *occP* and/or *mtoA* homologs (**Table S3**).  
 237 Environmental MAGs for uncultivated species are labeled with IDs. Genomes without *occP* on  
 238 the phylogeny included *Dechloromonas denitrificans* (GCA\_001551835.1), *Dechloromonas*  
 239 *agitata* is5 (GCA\_000519045.1), *Dechloromonas* UBA 5017 (GCA\_002396525.1),  
 240 *Dechloromonas* UBA 5021 (GCA\_002396725.1), and *Dechloromonas* UBA 5022  
 241 (GCA\_002396465.1). The deltaproteobacterium *Desulfovibrio vulgaris* was used as the outgroup  
 242 (GCA\_000195755.1). Bootstrap values over 50 are shown. GenBank assembly accession numbers  
 243 are given in **Table S3**.



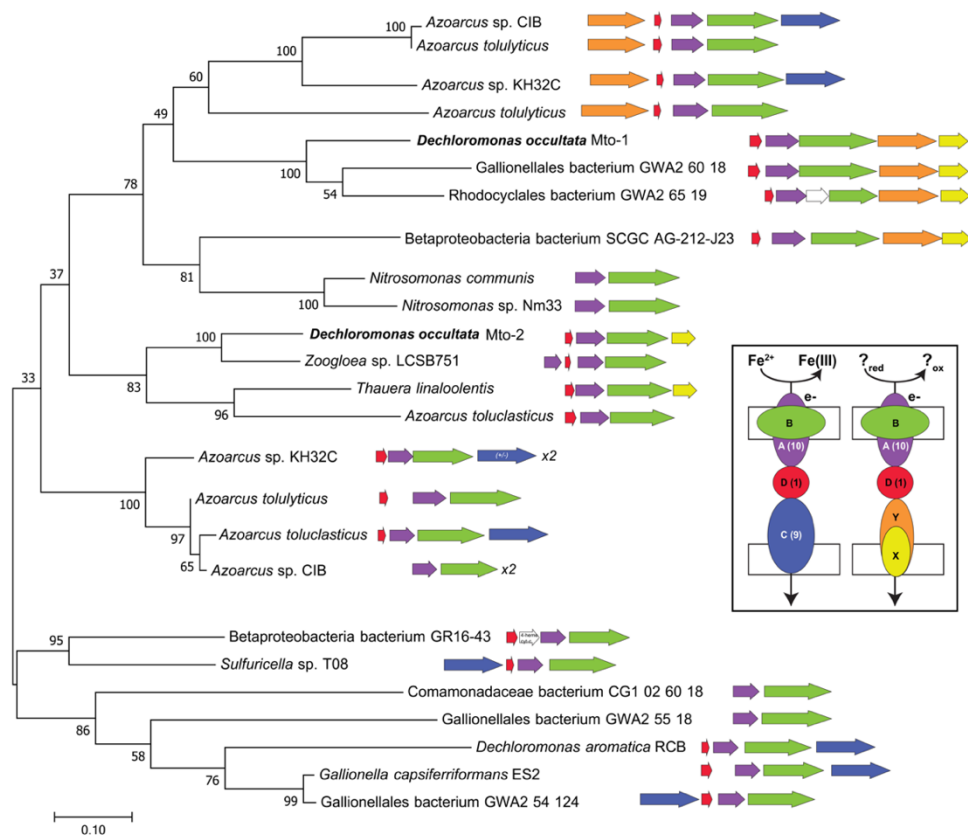

244

245 **Figure S4. Phylogeny of decaheme c-type cytochrome MtoA and synteny of Mto loci.**

246 Maximum likelihood phylogeny of the MtoA protein sequence from “*Ca. D. occultata*” in

247 relationship to other MtoA homologs from *Beta*- and *Gammaproteobacteria*. Accession numbers

248 are given in **Table S3**. Bootstrap support is based on 500 samples. Next to each branch is the

249 genomic organization of *mtoA* and neighboring genes in each species, color-coded to represent

250 function and predicted cellular locations. Species with duplicated clusters are annotated as “x2”.

251 Inset: left, canonical Mto pathway; right: proposed alternative Mto pathway in “*Ca. D. occultata*”

252 and other uncultured *Betaproteobacteria*; the labels A, B, C, D, X, and Y correspond to MtoA,

253 MtoB, MtoC, MtoX and MtoY, respectively, with heme counts in parentheses. OM: outer

254 membrane; IM: inner membrane.

255

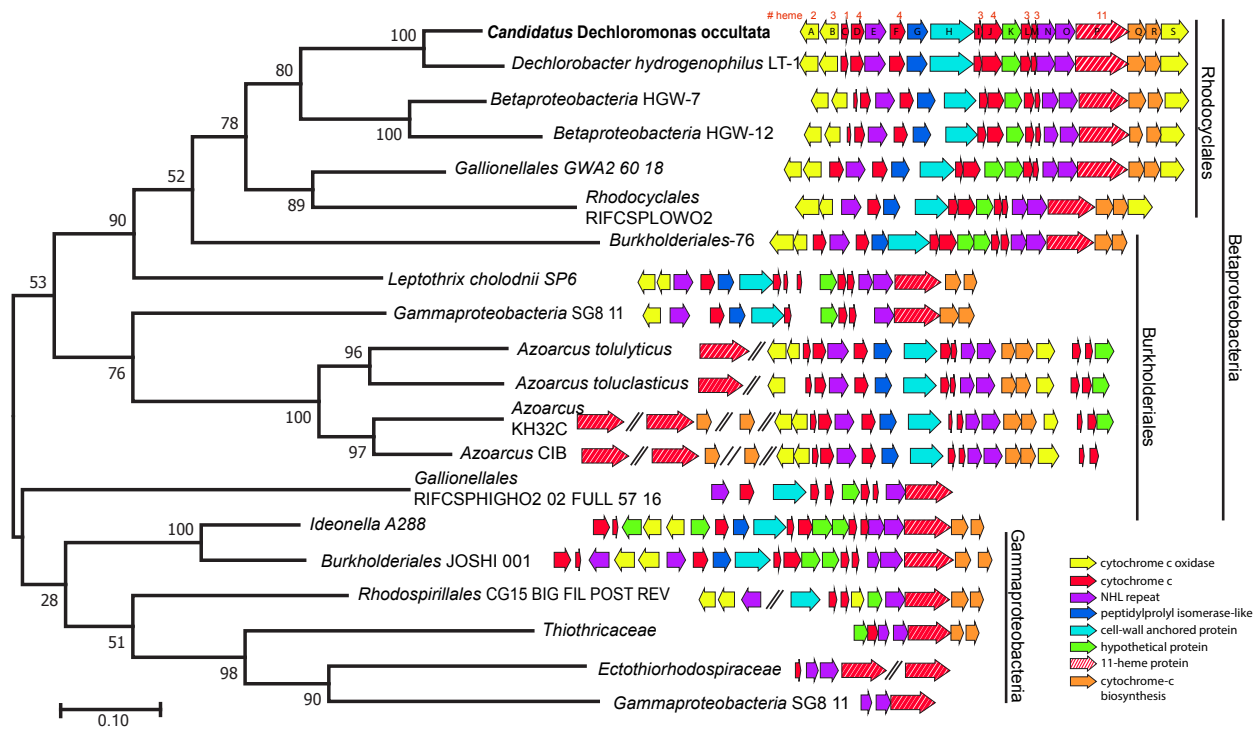

257

258 **Figure S5. Phylogeny of undeca-heme c-type cytochrome OccP and synteny of Occ loci.** The259 tree represents the evolutionary history of the OccP protein from “*Ca. D. occultata*” in relationship260 to other OccP homologs from Beta- and *Gammaproteobacteria*. Accession numbers are given in261 **Table S3**. Note that *Gammaproteobacteria* bacterium SG8-11 contains multiple copies of the *occ*262 operon, one of which is within the *Burkholderiales* clade. Branch lengths represent substitutions

263 per site. Next to each branch is the genomic organization of OccP and neighboring genes in each

264 strain, color-coded by function.

265

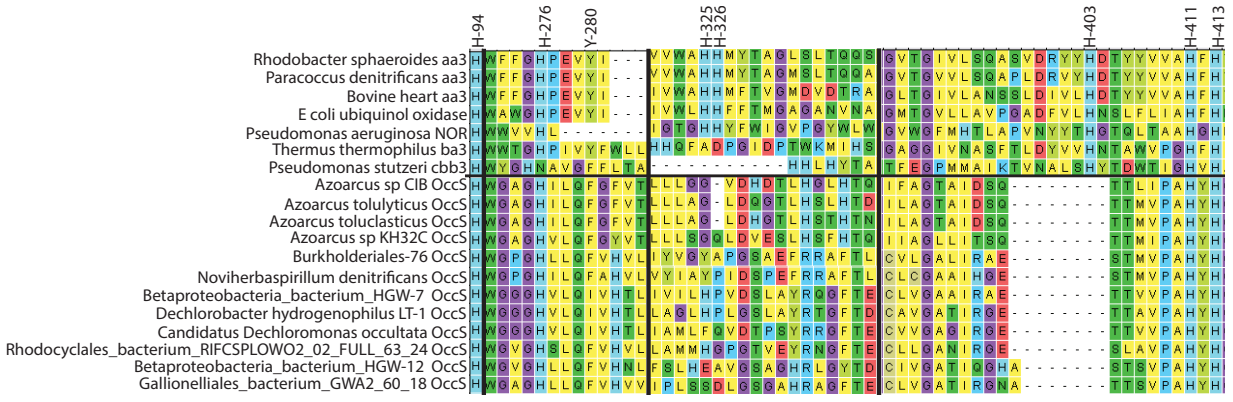

266

267 **Figure S6. Shared features of the OccS conserved domain in selected *Betaproteobacteria*.**

268 Alignment of conserved cofactor-binding (heme a, a<sub>3</sub>, and Cu<sub>B</sub>) histidines and select D and K

269 proton channel ligands for members of the cytochrome c oxidase subunit I family compared to

270 OccS. Numbering is for *Paracoccus denitrificans*.

271

272

273

274

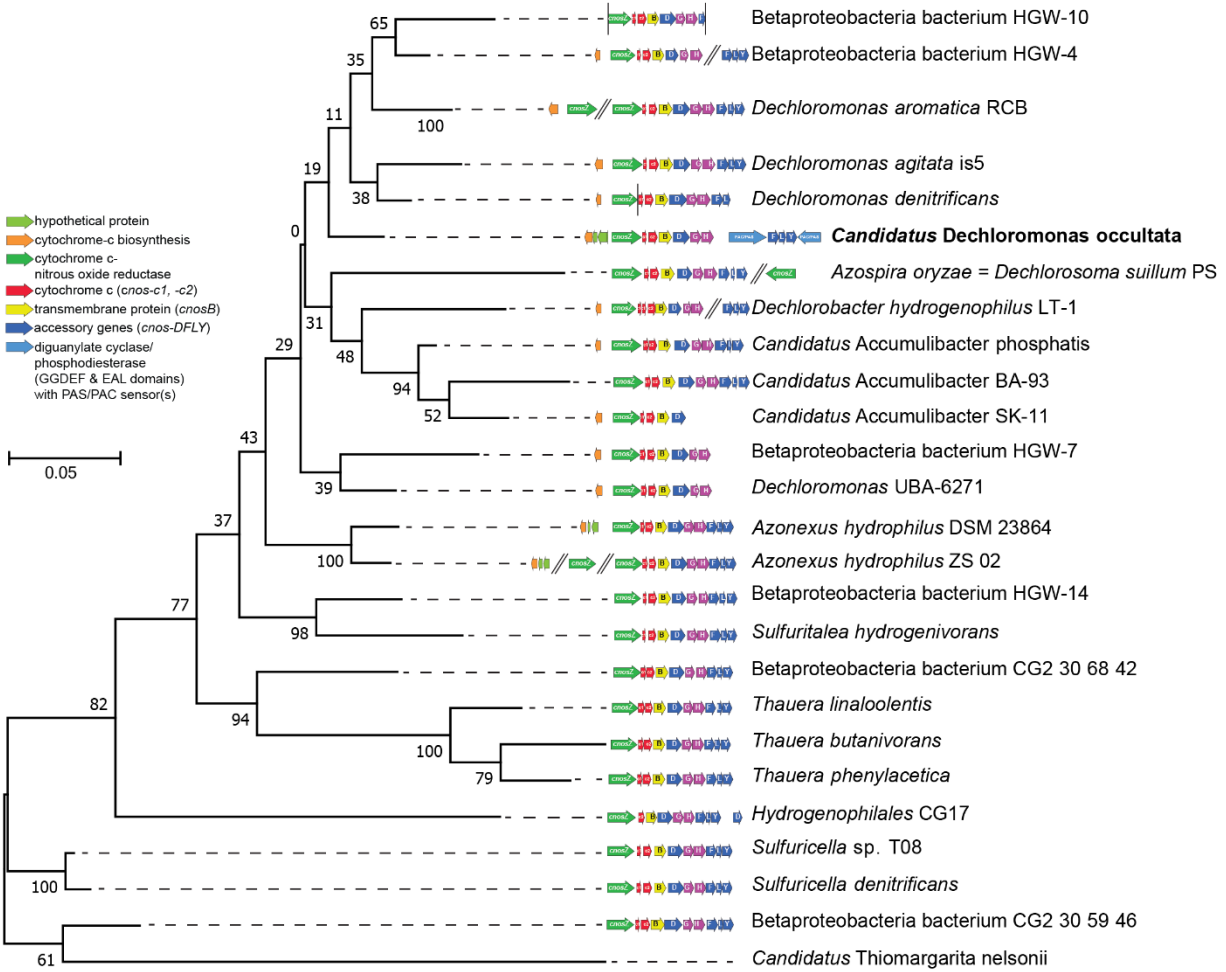

275

276

277

278

279

280

281

**Figure S7. Phylogeny of cytochrome-nitrous oxide reductase (cNosZ) genes and synteny of the synteny of cNosZ loci.** The tree represents the evolutionary history of the cNosZ protein from “*Ca. D. occultata*” in relationship to other cNosZ homologs from *Beta*- and *Gammaproteobacteria*. Accession numbers are given in Table 2. Branch lengths represent substitutions per site. Next to each branch we show the genomic organization of cNosZ and neighboring genes in each strain, color-coded by function.

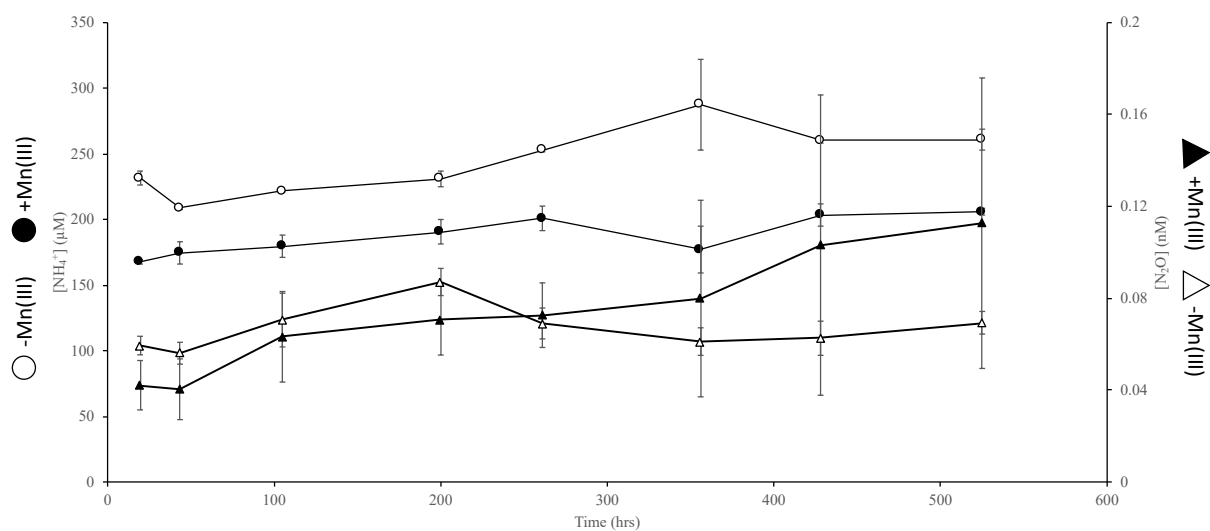

282  
 283  
 284 **Figure S8. Abiotic reactions between Mn(III) and NH<sub>4</sub><sup>+</sup>.** Concentrations of NH<sub>4</sub><sup>+</sup> (circles) and  
 285 N<sub>2</sub>O (triangles) from 0.2 mM NH<sub>4</sub><sup>+</sup> added to abiotic treatments with (1 mM; closed symbols) or  
 286 without (open symbols) added Mn(III) pyrophosphate. Error bars represent standard error where  
 287 n=3 (N<sub>2</sub>O) or n=2 (NH<sub>4</sub><sup>+</sup>).

288

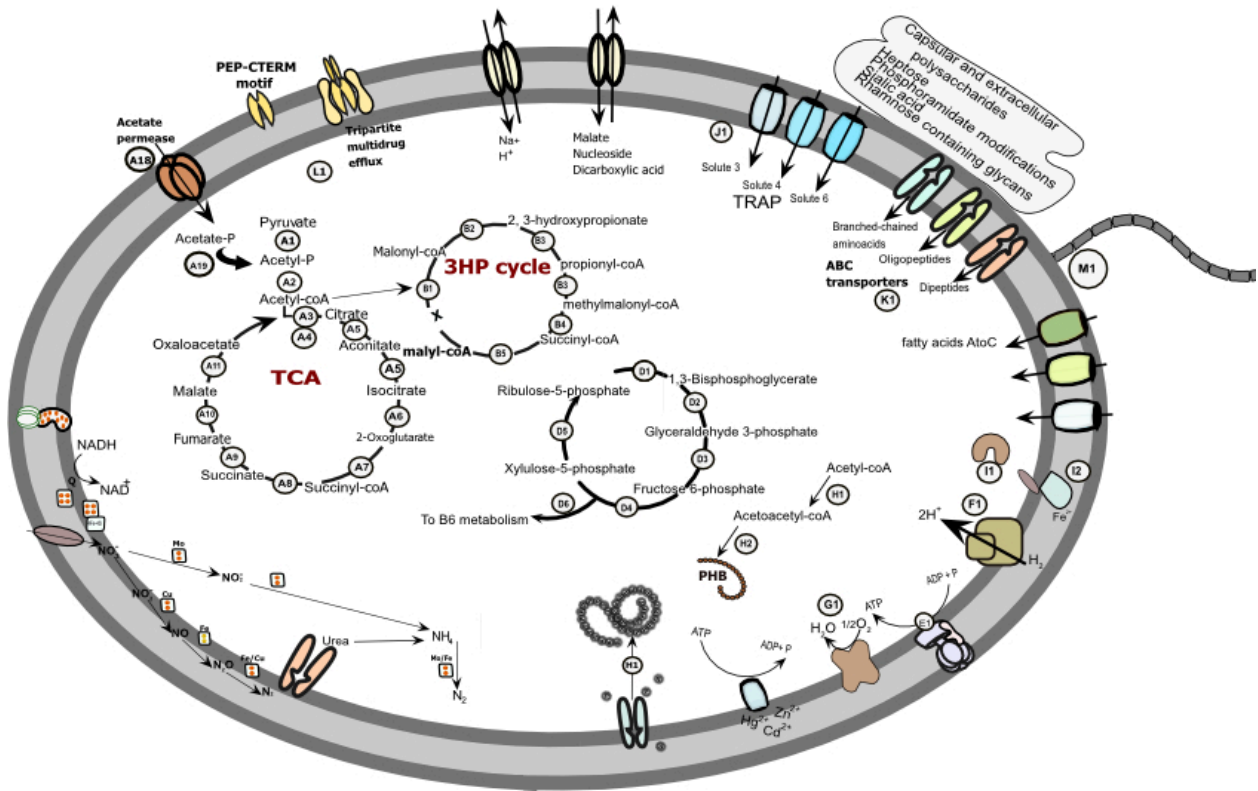

290

291 **Figure S9. “*Candidatus Dechloromonas occultata*” genomic potential and gene expression**292 **during Mn(III) reduction.** Key genes involved in central and secondary metabolism including

293 carbon and nitrogen metabolism, energy generation, and environmental sensing are shown.

294 Numbers correspond to proteins compiled in table S4.



```

1      10      20      30      40      50      60
FixL   EKQVEGALRTRETHLRSILHTIPDAMIVIDGHGIIQLFSTAAERLFGWSEL EAIGQNVNI
EcDosP .MKLTDADNAADGIFFPAL EQNMGA VLINEND EVMF FNPAAEKLWGYKREVI GNNIDM
AxpPDE-A1 . .MPDITALTTEILLPALEQAI DATVIIGQENEIFYNOAAESLWGI PRADVI GRNVDC
RIX42532.1 DITERKLAEDQLRIITARIFDRAGDAIVVTDARGRIQTVNGAFERITGYTPGEAIGKT TAL
RIX42529.1 DITEQRRVEEHLQLI THR VFE TTD QAMVITDHRACIISVNAFTRLTGYSR EA V G N P R I
consensus>50 d . . . . . e . . . . . i . . . . . ile . . . . . da ! vid . . . . . e ! . . . . . fn . Aaerl . Gy . r . # a ! G . nvd .

70      80      90      100     110
FixL   LMPPEPD RSRHDSYISRYR TTSDPHTIIGIRIVTGKRRDGTTFPMLSLIGEMQS . . GGEPEY
EcDosP LIPRDLRPAHPEYIRHNREGGKARVEGMSRELQLEKKDGSKIWTRFALSKVSA . . EGKVY
AxpPDE-A1 LVPTRLRHEHDRYIDRNR ETGHNRI VGT SREV EFT RADGEYICGELSLSKVQI . . GTGDK
RIX42532.1 L . . . . KSGRHSEQFY EKMWQDLQEKGF WQDEI WNK RKNGEI YPEWLTINRVD TPD GSTEH
RIX42529.1 L . . . . QSGRNDPSFY REMWRSLL EFGHWHGDI WDR RKD GSI YPKF L S I S A I R D V D G E V T H
consensus>50 L . p . . . . r . rhd . yi . rnr . . . . . i . g . . rev . . . . rk # G . . yp . . lsis . vq . . . . g . . . .

120     130     140     150
FixL   FTGFVVRDLTEHQQTQARLQELQSELVHVSRLS
EcDosP YLALVVRDASVEMAQKEQTRQLII . . . . .
AxpPDE-A1 RLTYYMGMKNVT EESQRRKILILQ . . . . .
RIX42532.1 YVAVFSDIS EIKD DQRKAQYLATHDAL TGLP .
RIX42529.1 YSGIF YDI T ERKVF E EKL DRI AHYDLL . . . . .
consensus>50 y . . . . f . di . e . . . . qq . . . . q . l . . . . d . . . . .

```

298

299 **Figure S11. Conserved features of sensor RIX42529 and betaproteobacterial homologs.**

300 Alignment of conserved heme-binding histidines for members of the PAS-O<sub>2</sub> sensor family

301 (FixL, EcDosP, and AxPDE-A1) and two predicted PAS sensors in “*Ca. D. occultata*”

302 (RIX42532 and RIX42529).



303 **References**

- 304 1 Aigle A, Bonin P, Iobbi-Nivol C, Mejean V, Michotey V (2017). Physiological and  
305 transcriptional approaches reveal connection between nitrogen and manganese cycles in  
306 *Shewanella algae* C6G3. *Sci Rep* **7**: 44725.  
307
- 308 2 Aziz RK, Bartels D, Best AA, DeJongh M, Disz T, Edwards RA *et al* (2008). The RAST  
309 Server: rapid annotations using subsystems technology. *BMC genomics* **9**: 75.  
310
- 311 3 Badalamenti JP, Summers ZM, Chan CH, Gralnick JA, Bond DR (2016). Isolation and  
312 genomic characterization of ‘*Desulfuromonas soudanensis* WTL’, a metal- and electrode-  
313 respiring bacterium from anoxic deep subsurface brine. *Frontiers in microbiology* **7**.  
314
- 315 4 Bankevich A, Nurk S, Antipov D, Gurevich AA, Dvorkin M, Kulikov AS *et al* (2012).  
316 SPAdes: a new genome assembly algorithm and its applications to single-cell sequencing.  
317 *Journal of computational biology* **19**: 455-477.  
318
- 319 5 Blomberg MR, Siegbahn PE (2014). Proton pumping in cytochrome c oxidase: Energetic  
320 requirements and the role of two proton channels. *Biochimica et Biophysica Acta (BBA)-*  
321 *Bioenergetics* **1837**: 1165-1177.  
322
- 323 6 Boumaiza H, Coustel R, Despas C, Ruby C, Bergaoui L (2018). Interaction of  
324 ammonium with birnessite: Evidence of a chemical and structural transformation in alkaline  
325 aqueous medium. *J Solid State Chem* **258**: 543-550.  
326
- 327 7 Bray MS, Wu J, Reed BC, Kretz CB, Belli KM, Simister RL *et al* (2017). Shifting  
328 microbial communities sustain multi-year iron reduction and methanogenesis in ferruginous  
329 sediment incubations. *Geobiology* **15**: 678-689.  
330
- 331 8 Brettin T, Davis JJ, Disz T, Edwards RA, Gerdes S, Olsen GJ *et al* (2015). RASTtk: a  
332 modular and extensible implementation of the RAST algorithm for building custom annotation  
333 pipelines and annotating batches of genomes. *Scientific reports* **5**: 8365.  
334
- 335 9 Burnes BS, Mulberry MJ, DiChristina TJ (1998). Design and application of two rapid  
336 screening techniques for isolation of Mn (IV) reduction-deficient mutants of *Shewanella*  
337 *putrefaciens*. *Applied and environmental microbiology* **64**: 2716-2720.  
338
- 339 10 Choi H, Kim S, Fermin D, Tsou C-C, Nesvizhskii AI (2015). QPROT: Statistical method  
340 for testing differential expression using protein-level intensity data in label-free quantitative  
341 proteomics. *Journal of proteomics* **129**: 121-126.  
342
- 343 11 Crowe SA, Jones C, Katsev S, Magen Cd, O'Neill AH, Sturm A *et al* (2008).  
344 Photoferrotrophs thrive in an Archean Ocean analogue. *Proceedings of the National Academy of*  
345 *Sciences* **105**: 15938-15943.  
346

- 347 12 Crowe SA, Canfield DE, Mucci A, Sundby B, Maranger R (2012). Anammox,  
348 denitrification and fixed-nitrogen removal in sediments from the Lower St. Lawrence Estuary.  
349 *Biogeosciences* **9**: 4309-4321.  
350
- 351 13 Dedysh SN, Dunfield PF, Trotsenko YA (2004). Methane utilization by  
352 *Methylobacterium* species: new evidence but still no proof for an old controversy. *Int J Syst Evol*  
353 *Microbiol* **54**: 1919-1920.  
354
- 355 14 Emerson D, Floyd MM (2005). Enrichment and isolation of iron-oxidizing bacteria at  
356 neutral pH. *Method Enzymol* **397**: 112-123.  
357
- 358 15 Eng JK, Jahan TA, Hoopmann MR (2013). Comet: an open-source MS/MS sequence  
359 database search tool. *Proteomics* **13**: 22-24.  
360
- 361 16 Gardy JL, Laird MR, Chen F, Rey S, Walsh C, Ester M *et al* (2004). PSORTb v. 2.0:  
362 expanded prediction of bacterial protein subcellular localization and insights gained from  
363 comparative proteome analysis. *Bioinformatics* **21**: 617-623.  
364
- 365 17 Gonska N, Young D, Yuki R, Okamoto T, Hisano T, Antonyuk S *et al* (2018).  
366 Characterization of the quinol-dependent nitric oxide reductase from the pathogen *Neisseria*  
367 *meningitidis*, an electrogenic enzyme. *Scientific reports* **8**: 3637.  
368
- 369 18 Green PN, Bousfield IJ (1983). Emendation of *Methylobacterium* Patt, Cole, and Hanson  
370 1976, *Methylobacterium-Rhodinum* (Heumann 1962) Comb-Nov-Corrig, *Methylobacterium-*  
371 *Radiotolerans* (Ito and Iizuka 1971) Comb-Nov-Corrig, and *Methylobacterium-Mesophilicum*  
372 (Austin and Goodfellow 1979) Comb-Nov. *Int J Syst Bacteriol* **33**: 875-877.  
373
- 374 19 Guanghuan G, Jianqiang Z, Aixia C, Bo H, Ying C, Kun G *et al* (2018). Nitrogen  
375 Removal and Nitrous Oxide Emission in an Anaerobic/Oxic/Anoxic Sequencing Biofilm Batch  
376 Reactor. *Environmental Engineering Science* **35**: 19-26.  
377
- 378 20 Hansen JW, Thamdrup B, Jørgensen BB (2000). Anoxic incubation of sediment in gas-  
379 tight plastic bags: a method for biogeochemical process studies. *Marine Ecology Progress Series*  
380 **208**: 273-282.  
381
- 382 21 Jones C, Crowe SA, Sturm A, Leslie KL, MacLean LCW, Katsev S *et al* (2011).  
383 Biogeochemistry of manganese in ferruginous Lake Matano, Indonesia. *Biogeosciences* **8**: 2977-  
384 2991.  
385
- 386 22 Jones DT, Taylor WR, Thornton JM (1992). The rapid generation of mutation data  
387 matrices from protein sequences. *Bioinformatics* **8**: 275-282.  
388
- 389 23 Kalyuzhnaya MG, Hristova KR, Lidstrom ME, Chistoserdova L (2008). Characterization  
390 of a novel methanol dehydrogenase in representatives of Burkholderiales: Implications for  
391 environmental detection of methylotrophy and evidence for convergent evolution. *J Bacteriol*  
392 **190**: 3817-3823.

393  
394 24 Kleiner M, Wentrup C, Lott C, Teeling H, Wetzel S, Young J *et al* (2012).  
395 Metaproteomics of a gutless marine worm and its symbiotic microbial community reveal unusual  
396 pathways for carbon and energy use. *Proceedings of the National Academy of Sciences* **109**:  
397 E1173-E1182.  
398  
399 25 Kostka JE, Luther III GW, Nealson KH (1995). Chemical and biological reduction of Mn  
400 (III)-pyrophosphate complexes: potential importance of dissolved Mn (III) as an environmental  
401 oxidant. *Geochimica et Cosmochimica Acta* **59**: 885-894.  
402  
403 26 Kumar S, Stecher G, Tamura K (2016). MEGA7: Molecular Evolutionary Genetics  
404 Analysis version 7.0 for bigger datasets. *Molecular biology and evolution* **33**: 1870-1874.  
405  
406 27 Kuntz L, Laakso T, Schrag D, Crowe S (2015). Modeling the carbon cycle in Lake  
407 Matano. *Geobiology* **13**: 454-461.  
408  
409 28 Lee MD (2019). GToTree: a user-friendly workflow for phylogenomics. *Bioinformatics*.  
410  
411 29 Liu Y, Peng L, Guo J, Chen X, Yuan Z, Ni B-J (2015). Evaluating the Role of Microbial  
412 Internal Storage Turnover on Nitrous Oxide Accumulation During Denitrification. *Scientific*  
413 *Reports* **5**: 15138.  
414  
415 30 MacLean B, Tomazela DM, Abbatiello SE, Zhang S, Whiteaker JR, Paulovich AG *et al*  
416 (2010). Effect of collision energy optimization on the measurement of peptides by selected  
417 reaction monitoring (SRM) mass spectrometry. *Analytical chemistry* **82**: 10116-10124.  
418  
419 31 Nesvizhskii AI, Keller A, Kolker E, Aebersold R (2003). A statistical model for  
420 identifying proteins by tandem mass spectrometry. *Analytical chemistry* **75**: 4646-4658.  
421  
422 32 Nunn BL, Slattery KV, Cameron KA, Timmins-Schiffman E, Junge K (2015).  
423 Proteomics of *Colwellia psychrerythraea* at subzero temperatures—a life with limited movement,  
424 flexible membranes and vital DNA repair. *Method Enzymol* **17**: 2319-2335.  
425  
426 33 Overbeek R, Olson R, Pusch GD, Olsen GJ, Davis JJ, Disz T *et al* (2013). The SEED and  
427 the Rapid Annotation of microbial genomes using Subsystems Technology (RAST). *Nucleic*  
428 *acids research* **42**: D206-D214.  
429  
430 34 Parks DH, Imelfort M, Skennerton CT, Hugenholtz P, Tyson GW (2015). CheckM:  
431 assessing the quality of microbial genomes recovered from isolates, single cells, and  
432 metagenomes. *Genome Res* **25**: 1043-1055.  
433  
434 35 Rambaut A (2012). FigTree: Tree Figure Drawing Tool. Available at  
435 <http://tree.bio.ed.ac.uk/software/figtree/>.  
436

437 36 Schloss PD, Westcott SL, Ryabin T, Hall JR, Hartmann M, Hollister EB *et al* (2009).  
438 Introducing mothur: open-source, platform-independent, community-supported software for  
439 describing and comparing microbial communities. *Appl Environ Microbiol* **75**: 7537-7541.  
440  
441 37 Seemann T (2014). Prokka: rapid prokaryotic genome annotation. *Bioinformatics* **30**:  
442 2068-2069.  
443  
444 38 Shimizu T, Huang D, Yan F, Stranova M, Bartosova M, Fojtíková V *et al* (2015).  
445 Gaseous O<sub>2</sub>, NO, and CO in signal transduction: structure and function relationships of heme-  
446 based gas sensors and heme-redox sensors. *Chemical reviews* **115**: 6491-6533.  
447  
448 39 Van Aken B, Peres CM, Doty SL, Yoon JM, Schnoor JL (2004). *Methylobacterium*  
449 *populi* sp. nov., a novel aerobic, pink-pigmented, facultatively methylotrophic, methane-utilizing  
450 bacterium isolated from poplar trees (*Populus deltoides*×*nigra* DN34). *International Journal of*  
451 *Systematic and Evolutionary Microbiology* **54**: 1191-1196.  
452  
453 40 Veltri D, Wight MM, Crouch JA (2016). SimpleSynteny: a web-based tool for  
454 visualization of microsynteny across multiple species. *Nucleic acids research* **44**: W41-W45.  
455  
456 41 Wattam AR, Abraham D, Dalay O, Disz TL, Driscoll T, Gabbard JL *et al* (2013).  
457 PATRIC, the bacterial bioinformatics database and analysis resource. *Nucleic acids research* **42**:  
458 D581-D591.  
459  
460 42 Wu Y-W, Simmons BA, Singer SW (2015). MaxBin 2.0: an automated binning algorithm  
461 to recover genomes from multiple metagenomic datasets. *Bioinformatics* **32**: 605-607.  
462  
463 43 Zorz JK, Kozłowski JA, Stein LY, Strous M, Kleiner M (2018). Comparative Proteomics  
464 of Three Species of Ammonia-Oxidizing Bacteria. *Frontiers in Microbiology* **9**: 938.  
465  
466  
467
